# Supplementary material for: WITHDRAWN: Microsatellite Marker Based DNA Fingerprinting of Cotton (Gossypium Spp.) Hybrids and Their Parents
Source: Research Square preprint supplement (doi:10.21203/rs.3.rs-882663/v1), 2021-09-21
Supplement: Supplementary file 1 [file a2c7c9d842ed5af5f7eb220f.docx]

**Title of the Research Paper:** Microsatellite marker based DNA fingerprinting of cotton (*Gossypium spp.*) hybrids and their parents

**Authors:** Santosh HB1, Ashwini Bargat1, Santhy V1*, Raghavendra KP 1, Kranthi KR2, Waghmare VN1

**Author(s) affiliation(s):**

1. ICAR – Central Institute for Cotton Research (CICR), Nagpur – 440 010, INDIA;
2. International Cotton Advisory Committee (ICAC), Washington DC, USA

1* Corresponding author

**Supplementary Table 1. List of polymorphic markers, their repeat motif and sequence information**

| **S. No.** | **Marker** | **Repeat motif** | **Forward primer** | **Reverse Primer** |
| --- | --- | --- | --- | --- |
| 1 | BNL0852 | (CA)13 | TGCTTTCAGCCAATGACTTG | AACAATGCCCCCAATATTCA |
| 2 | BNL0861 | (AC)21 | AAGATGGTAGTGGCTTGAACG | GTTCCTTCTTACTTCCATGTGC |
| 3 | BNL1045 | (AG)16, (CA)10 | GGCAATCAACTTTAGGCTGC | TGGTGAAGATCCCCATTTTC |
| 4 | BNL1227 | (AG)15 | CATCAAGATCTATCTCTCTCTATACCG | TTTACCCTCCGATCTCAACG |
| 5 | BNL1317 | (AG)14 | AAAAATCAGCCAAATTGGGA | CGTCAACAATTGTCCCAAGA |
| 6 | BNL1421 | (AG)29, (AG)14 | TGAAGATTTGGAGGCAATTG | GAAATCAAGCCTCAATTCGG |
| 7 | BNL1604 | (AG)25 | AGAGGGAGTAAAGATTTGGGG | TCCAGTTCTTTTTGCCTTGG |
| 8 | BNL2449 | (GA)16, (TC)16 | ATCTTTCAAACAACGGCAGC | CGATTCCGGACTCTTGATGT |
| 9 | BNL2544 | (AG)11 | GCCGAAACTAAAACGTCCAA | TCCTTACTCACTAAGCAGCCG |
| 10 | BNL2634 | (AG)11 | AACAACATTGAAAGTCGGGG | CCCAGCTGCTTATTGGTTTC |
| 11 | BNL2725 | (AG)28 | AGCATTAGCAGGCACCTTTATA | ACATTTGGTTCGTTTTCTCTTTAA |
| 12 | BNL2741 | (GA)15, (TC)15 | TGTGGAGTTGTTTGTCTCGC | GTCAACAGTCCTCTGCTGCA |
| 13 | BNL3031 | (AG)27 | AGGCTGACCCTTTAAGGAGC | AACCAACTTTTCCAACACCG |
| 14 | BNL3090 | (AG)31 | GAAATCATTGGAAGAACATATACTACA | TTGCTCCGTATTTTCCAGCT |
| 15 | BNL3383 | (AG)10, (CT)11 | GTGTTGTCATCGGCACTGAC | TGCAATGGTTCAGTGGTGAT |
| 16 | BNL3442 | (CA)14(TA)5 | CATTAGCGGATTTGTCGTGA | AACGAACAAAGCAAAGCGAT |
| 17 | BNL3594 | (TC)37 | AGGGATTTTGATTGTTGTGC | TGAATTCAAAACAAATGTTAGCC |
| 18 | BNL3644 | (TC)13 | GTGCTGTTTGGGCCTTACAT | TAAGCGCATTGACACACACA |
| 19 | BNL3806 | (TG)18, (AG)18, (AC)9+N+(CA)7+C+N+(CA)2+(AT)5 | GACAGGCCAGACCAGAACAT | TCAAACAAAGCACATATATAATACACA |
| 20 | BNL3812 | (CA)6+C+N+(CA)11 | AACCACCCCAATTTGATGAT | GGGTTTCTCCTTCCCTGTTC |
| 21 | BNL3816 | (TG)15, (TG)5TA(TG)15 | GTTAGCCACGTGTTAGTTCTATG | ATCGATCACTTGCTGGTTCC |
| 22 | BNL3992 | (TC)26, (GA)26 | CAGAAGAGGAGGAGGTGGAG | TGCCAATGATGGAAAACTCA |
| 23 | BNL3995 | (AC)16 | ATATTTTATTCTTTTAATAGCTTTATTCCC | TTGGAAAAACCCATGGTGAT |
| 24 | BNL4061 | (CA)26 | TAGTAGGTGTCCCCTGTGCC | TGAAGCACCAGATGAAAACA |
| 25 | BNL4071 | (GT)7+(GA)23 | CATTTCAGAAGTTGACATTTTCG | CACTGCCCCTAAGAAGTTGC |
| 26 | BNL4096 | (GT)8+(GA)17 | TGTGGTGGGTTTCACTTTCA | GACACGGATCCTACTGAGCC |
| 27 | BNL0946 | (GA)14 | GCTGTTGCTCCACATCTCCT | GGGCAAACAGATAGGCAGAA |
| 28 | CM0043 | (TC)20 | GCGCAGATATTATTATCACAGC | TATATAAATTTGCATCAGTTGGC |
| 29 | CM0066 | (CT)14 | GGATACGTAGGCCTCCACATATTC | GCTGCCTGCTGTTGAATGCTG |
| 30 | DPL0600 | - | AGGCACCTCTTTAGTGATACTAATTCC | TTAAGGGTAGCCCTCTCAATCTCT |
| 31 | GH288 | GT(22) | CTATTCCACAAGCTTCATTCTGCAG | GGAGCACAATGAGGAAGTATACTG |
| 32 | GH434 | AGA(18) | AGAGCTAGTAGGTGGCTTAAAGAG | GTGGATGAATTATCTAAGTCGACCG |
| 33 | GH470 | CT(19) | ACATCAACTTTCAAACCGTTCAACC | CTGGAAGCTAAATATACAGAGCAAG |
| 34 | GH486 | TCT(20) | TTGTCACCCTAAATTACATTGAATGGC | GTAAAGGCTTTGACTACAAGCACC |
| 35 | GH527 | TCT(6) | AGCTGGAGGATTTCAGCTTGATTC | ATGCCAGTTAACTTACCACGTTGG |
| 36 | GH539 | AC(13) | AGTTCGTGCCTTTGATACTGAAGG | CAAACGAAGTGAATGTTAGTCTATTCG |
| 37 | JESPR101 | (TA)3(GT)15 | CCAAGTCAAGGTGAGTTATATG | GCTCTTTGTTACTGAAATGGG |
| 38 | JESPR151 | (GAA)9(Y)4(GAA)10 | CTGGACTAAAAACCTTAACTGG | CTCGATTCTAACTCAATCACG |
| 39 | JESPR152 | (GAA)50 | GATGCACCAGATCCTTTTATTAG | GGTACATCGGAATCACAGTG |
| 40 | JESPR197 | (TAC)11 | CAATACCTGGAACATAGACAAATG | CTTGAGGCTTGCAAAAAATG |
| 41 | JESPR215 | (GA)22 | CGAGAAGATGAGATTGGAGGAG | CCCTTCTGAGTTTTCTTTGG |
| 42 | JESPR220 | (GA)20 | CGAGGAAGAAATGAGGTTGG | CTAAGAACCAACATGTGAGACC |
| 43 | JESPR224 | (GA)22 | GGGGAGCAACGAAAACTTAGC | CCACCATTCTCTTTCATTTTCTCC |
| 44 | JESPR0065 | (GAA)25 | CCACCCAATTTAAGAAGAAATTG | GGTTAGTTGTATTAGGGTCGTTG |
| 45 | MUCS557 | GTT(2)CTG(4) | GGCATCTAGTTGAGGGAAGG | TGGAACATGCACTTTAATCACC |
| 46 | MUCS566 | AAC(2)GAC(4) | CAGAGGAGAGAAGAGAAGAGAGG | GGATTTTGAAGAGCCTCAACC |
| 47 | MUCS620 | TTA(2)TA(6) | CGAAGATGGGAAGAGAAAGG | CAAAAGCTAGCAACATTACAACTCC |
| 48 | MUSB0100 | (AT)5 | TTCTGTTCCCACATTTCAAGC | AAAGGGGTGCTGGTTTCG |
| 49 | MUSS161 | GGA(4) | AGAGGAATCGGACAATGACG | CCCAAGAATCTGAAGCATCC |
| 50 | MUSS397 | GCT(4) | ACAAGCTAACGGTGACTGGC | CTTCTCCTCGGGTTTCTTCC |
| 51 | NAU1070 | (AGG)10 | CCCTCCATAACCAAAAGTTG | ACCAACAATGGTGACCTCTT |
| 52 | NAU1190 | (GGC)6 | CCATGTCCGTATCCATGTTA | TAAGGCAAGATAGGGTCAGG |
| 53 | NAU2083 | GAC(9) | AGAAGAGGTTGACGGTGAAG | TGAGTGAAGAACCTGCACAT |
| 54 | NAU4073 | (ATGT)6 | CCCACCCTTTTCTTCTTTTT | GCTGCCAAATTTCATCTCTT |
| 55 | NAU5046 | (CATC)6 | CTTCCCTCCTCTGTCTCTCA | GAGAGAGGGGAAAGTTAGGG |
| 56 | NAU5189 | (TTC)8 | TGTCCCCCAATCATATTTTC | CAACTTCCCAAGCTCGTATT |
| 57 | TMB0436 | (GA)5+(GA)17+(GAA)4 | TGTGGCACAACCTTCCAAT | CGTGTTCTCCATTTGATTCAT |
| 58 | TMB1427 | (CA)26 | TGTTTTTGGGTACAGTTTTGACA | TTCTCTTCAAAGGGGAGTGTTT |
| 59 | TMB1484 | (CA)18 | ACCACCCCAATTTGATGATT | GGGTTTCTCCTTCCCTGTTC |
| 60 | TMB1645 | (GA)36+(GA)12 | AAATCCATTAGAATGTATAGGG | TCAGTTCTTCCGGCTGTAG |
